# Supplementary material for: Anticancer effects on human pancreatic cancer cells of triterpenoids, polysaccharides and 1,3-β-d-glucan derived from the fruiting body of Antrodia camphorata
Source: Royal Society of Chemistry journal article supplement (doi:10.1039/c4fo00720d), 2014-10-15
Supplement: c4fo00720d1.pdf [file c4fo00720d1.pdf]

## Supplimentary Information

**Fig. S1** HPLC chromatogram of *A. camphorata* fruiting body. Identification of peaks:

A:ascorbic acid; B:2,3-dimethoxy-5-methyl[1,4]benzoquinone; C:2,4,5-trimethoxybenzaldehyde; D:4,7-dimethoxy-5-methyl-1,3-benzodioxole; E:R,S-zhankuic acid C; F: dehydrosulphurenic acid; G:R,S-zhankuic acid A; H:zhankuic acid B; and I:dehydroeburicoic acid.

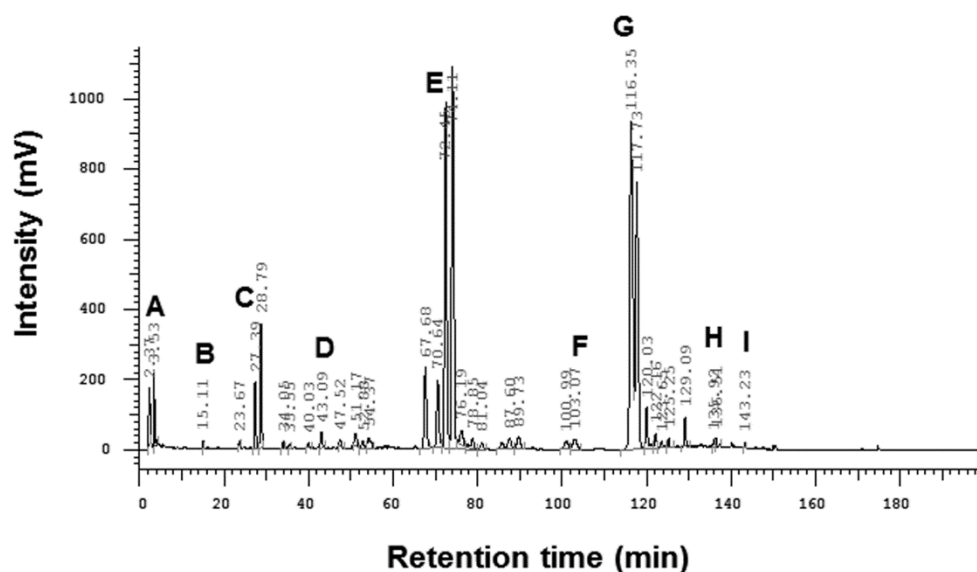

**Fig. S1**

## Supplimentary Information

**Fig. S1** HPLC chromatogram of *A. camphorata* fruiting body. Identification of peaks:

A:ascorbic acid; B:2,3-dimethoxy-5-methyl[1,4]benzoquinone; C:2,4,5-trimethoxybenzaldehyde; D:4,7-dimethoxy-5-methyl-1,3-benzodioxole; E:R,S-zhankuic acid C; F: dehydrosulphurenic acid; G:R,S-zhankuic acid A; H:zhankuic acid B; and I:dehydroeburicoic acid.
